# Supplementary material for: Plasma 25-Hydroxyvitamin D Level and VDR Gene Single Nucleotide Polymorphism rs2228570 Influence on COVID-19 Susceptibility among the Kazakh Ethnic Group—A Pilot Study
Source: MDPI journal article supplement (doi:10.3390/nu15071781), 2023-04-06
Supplement: s1 [file s1]

## Supplementary Materials

**Supplementary Table S1.** Characteristics of study participants ( $n = 119$ )

| No. | Sex | Age | BMI <sup>a</sup> | Tobacco<br>Use | IgG<br>ng/mL | IgM<br>ng/mL | 25(OH)D<br>ng/mL | Test Date | rs2228570<br>genotype |
|-----|-----|-----|------------------|----------------|--------------|--------------|------------------|-----------|-----------------------|
| 1   | M   | 21  | 20.1             | Yes            | 0.16         | 5.4          | 18.295           | 17.10.22  | AA                    |
| 2   | F   | 20  | 28.6             | No             | 0.13         | 0.34         | 16.922           | 17.10.22  | AC                    |
| 3   | F   | 53  | 26.8             | No             | 8.2          | 0.54         | 17.569           | 17.10.22  | AA                    |
| 4   | M   | 30  | 22.7             | No             | 3.09         | 0.64         | 20.704           | 17.10.22  | AA                    |
| 5   | M   | 49  | 22.1             | Yes            | 8.5          | 8.5          | 9.974            | 17.10.22  | AC                    |
| 6   | F   | 22  | 23.5             | No             | 0.22         | 0.45         | 76.622           | 17.10.22  | AC                    |
| 7   | F   | 39  | 25.1             | Yes            | 0.41         | 0.31         | 21.317           | 19.10.22  | AG                    |
| 8   | F   | 32  | 29.5             | No             | 2.12         | 0.57         | 49.812           | 19.10.22  | AA                    |
| 9   | M   | 69  | 28.4             | No             | 9.69         | 7.49         | 7.227            | 19.10.22  | AG                    |
| 10  | M   | 36  | 23.1             | Yes            | 8.1          | 0.78         | 30.817           | 19.10.22  | GG                    |
| 11  | F   | 36  | 20.6             | Yes            | 1.2          | 9.8          | 5.021            | 19.10.22  | GG                    |
| 12  | F   | 38  | 25.3             | No             | 0.95         | 2.89         | 73.59            | 21.10.22  | AG                    |
| 13  | F   | 59  | 32.4             | No             | 0.19         | 0.31         | 11.373           | 21.10.22  | AC                    |
| 14  | M   | 53  | 25.6             | Yes            | 7.98         | 5.73         | 24.419           | 21.10.22  | AG                    |
| 15  | F   | 65  | 20.3             | No             | 8.96         | 1.67         | 29.102           | 21.10.22  | GT                    |
| 16  | F   | 46  | 19.8             | No             | 0.18         | 0.4          | 25.422           | 21.10.22  | GG                    |
| 17  | F   | 48  | 26.7             | No             | 8.43         | 1.22         | 39.137           | 21.10.22  | GT                    |
| 18  | F   | 59  | 24.8             | No             | 7.91         | 1.74         | 23.75            | 21.10.22  | GG                    |
| 19  | F   | 55  | 27.5             | No             | 1.27         | 0.45         | 26.146           | 21.10.22  | GC                    |
| 20  | M   | 58  | 26.4             | Yes            | 0.23         | 0.3          | 17.303           | 21.10.22  | AG                    |
| 21  | F   | 56  | 33.7             | Yes            | 9.44         | 1.16         | 7.306            | 21.10.22  | AT                    |
| 22  | M   | 74  | 34.1             | Yes            | 0.32         | 0.46         | 6.537            | 21.10.22  | AG                    |
| 23  | F   | 74  | 24.6             | No             | 11.73        | 7.49         | 4.683            | 21.10.22  | GT                    |
| 24  | M   | 35  | 31.1             | No             | 10.14        | 21.17        | 9.377            | 21.10.22  | AG                    |
| 25  | F   | 19  | 21.3             | No             | 0.21         | 0.47         | 29.223           | 21.10.22  | GG                    |
| 26  | F   | 35  | 23.7             | No             | 0.62         | 0.4          | 19.116           | 21.10.22  | AG                    |
| 27  | F   | 23  | 21.9             | No             | 0.97         | 0.56         | 16.807           | 21.10.22  | AG                    |
| 28  | M   | 48  | 24.5             | No             | 0.73         | 0.79         | 35.435           | 24.10.22  | CC                    |
| 29  | M   | 18  | 25.2             | Yes            | 10.88        | 0.86         | 15.641           | 24.10.22  | AA                    |
| 30  | F   | 69  | 37.8             | No             | 11.52        | 1.04         | 55.223           | 24.10.22  | AG                    |
| 31  | F   | 60  | 26.5             | No             | 10.61        | 0.76         | 29.888           | 24.10.22  | GT                    |
| 32  | F   | 77  | 20.3             | No             | 3.243        | 0.77         | 32.327           | 24.10.22  | AG                    |
| 33  | F   | 56  | 30.5             | No             | 0.121        | 0.18         | 34.933           | 24.10.22  | GT                    |
| 34  | F   | 33  | 24.5             | No             | 8.98         | 0.78         | 61.419           | 24.10.22  | GG                    |
| 35  | F   | 50  | 26.7             | No             | 6.8          | 0.51         | 48.064           | 24.10.22  | AA                    |
| 36  | F   | 51  | 24.6             | No             | 0.14         | 0.66         | 59.122           | 25.10.22  | AG                    |
| 37  | F   | 46  | 27.5             | No             | 0.18         | 0.62         | 39.81            | 25.10.22  | AG                    |
| 38  | M   | 23  | 24.8             | Yes            | 0.3          | 0.47         | 64.782           | 25.10.22  | AA                    |
| 39  | M   | 74  | 30.6             | No             | 11           | 0.6          | 40.651           | 25.10.22  | GG                    |
| 40  | F   | 30  | 25.7             | Yes            | 3.42         | 0.56         | 40.651           | 25.10.22  | GG                    |
| 41  | F   | 54  | 27.9             | Yes            | 10.07        | 0.28         | 54.895           | 25.10.22  | AG                    |
| 42  | F   | 27  | 42.0             | No             | 4.51         | 0.63         | 8.777            | 25.10.22  | GG                    |
| 43  | F   | 25  | 21.4             | No             | 8.45         | 1.27         | 34.495           | 25.10.22  | GT                    |
| 44  | M   | 30  | 26.1             | No             | 3.17         | 0.28         | 14.832           | 25.10.22  | AG                    |
| 45  | F   | 49  | 32.5             | No             | 10.24        | 0.59         | 20.188           | 25.10.22  | AG                    |
| 46  | M   | 20  | 28.6             | Yes            | 11.14        | 0.63         | 5.101            | 25.10.22  | AT                    |

|    |   |    |      |     |       |      |        |          |    |
|----|---|----|------|-----|-------|------|--------|----------|----|
| 47 | F | 38 | 25.9 | No  | 0.7   | 0.47 | 22.296 | 25.10.22 | GC |
| 48 | F | 50 | 29.4 | No  | 9.06  | 0.69 | 7.250  | 25.10.22 | AT |
| 49 | F | 64 | 31.1 | No  | 9.47  | 0.3  | 4.260  | 25.10.22 | GT |
| 50 | F | 45 | 27.1 | No  | 0.2   | 0.23 | 58.440 | 25.10.22 | GT |
| 51 | F | 48 | 25.8 | No  | 3.9   | 0.59 | 7.375  | 25.10.22 | GT |
| 52 | F | 48 | 23.5 | No  | 8.53  | 0.29 | 26.737 | 25.10.22 | AG |
| 53 | F | 41 | 29.5 | No  | 0.18  | 0.17 | 60.312 | 25.10.22 | GC |
| 54 | F | 57 | 25.0 | No  | 7.12  | 0.36 | 44.743 | 25.10.22 | GT |
| 55 | F | 54 | 34.6 | No  | 4.31  | 0.34 | 10.210 | 27.10.26 | TT |
| 56 | F | 27 | 27.9 | Yes | 7.58  | 0.28 | 6.222  | 27.10.26 | GG |
| 57 | F | 32 | 22.6 | No  | 0.3   | 0.95 | 4.509  | 27.10.26 | GC |
| 58 | M | 61 | 28.3 | No  | 0.16  | 0.2  | 31.486 | 27.10.26 | GT |
| 59 | F | 51 | 22.4 | No  | 9.57  | 0.3  | 19.789 | 27.10.26 | GT |
| 60 | M | 68 | 26.2 | Yes | 0.19  | 0.23 | 15.858 | 27.10.26 | AC |
| 61 | F | 49 | 19.7 | No  | 3.45  | 0.38 | 50.882 | 27.10.26 | AA |
| 62 | F | 38 | 26.2 | No  | 6.3   | 0.33 | 53.75  | 27.10.26 | GG |
| 63 | F | 20 | 28.5 | No  | 1.95  | 8.93 | 12.552 | 27.10.26 | AG |
| 64 | F | 37 | 23.8 | No  | 6.78  | 0.8  | 10.283 | 27.10.26 | GG |
| 65 | M | 38 | 30.1 | Yes | 8.45  | 0.27 | 35.981 | 27.10.26 | AT |
| 66 | F | 45 | 24.9 | No  | 5.54  | 1.08 | 20.397 | 27.10.26 | AT |
| 67 | F | 45 | 27.5 | No  | 2.7   | 0.27 | 21.385 | 27.10.26 | AG |
| 68 | F | 36 | 30.6 | No  | 1.46  | 0.23 | 28.634 | 27.10.26 | TT |
| 69 | M | 54 | 42.1 | No  | 4.39  | 0.59 | 15.024 | 31.10.22 | GG |
| 70 | F | 33 | 22.7 | No  | 12.76 | 0.34 | 34.518 | 31.10.22 | AT |
| 71 | F | 38 | 25.5 | Yes | 13.11 | 0.96 | 21.574 | 31.10.22 | GT |
| 72 | F | 48 | 23.7 | No  | 0.26  | 0.18 | 51.559 | 31.10.22 | GT |
| 73 | M | 18 | 18.3 | No  | 0.55  | 0.32 | 47.883 | 31.10.22 | GC |
| 74 | M | 18 | 24.7 | Yes | 11.64 | 0.33 | 33.697 | 31.10.22 | GG |
| 75 | F | 42 | 29.4 | No  | 11.23 | 0.61 | 5.087  | 31.10.22 | GG |
| 76 | F | 42 | 26.3 | No  | 3.04  | 0.28 | 16.922 | 31.10.22 | AT |
| 77 | F | 38 | 23.8 | No  | 3.23  | 0.44 | 51.236 | 31.10.22 | AG |
| 78 | F | 36 | 27.9 | No  | 2.28  | 0.19 | 14.994 | 31.10.22 | AT |
| 79 | M | 48 | 26.4 | No  | 1.15  | 0.21 | 18.207 | 03.11.22 | GT |
| 80 | F | 42 | 25.6 | No  | 0.17  | 0.28 | 22.491 | 03.11.22 | AG |
| 81 | F | 42 | 32.8 | No  | 1.61  | 0.57 | 12.351 | 03.11.22 | GG |
| 82 | F | 47 | 31.8 | No  | 0.26  | 0.35 | 79.334 | 03.11.22 | GC |
| 83 | M | 34 | 28.6 | Yes | 1.76  | 0.59 | 8.357  | 03.11.22 | AG |
| 84 | F | 44 | 31.1 | No  | 5.19  | 0.51 | 10.71  | 03.11.22 | AG |
| 85 | F | 60 | 34.2 | No  | 12.8  | 0.51 | 9.945  | 03.11.22 | GG |
| 86 | F | 59 | 28.5 | No  | 13.34 | 0.32 | 24.098 | 03.11.22 | GG |
| 87 | F | 27 | 23.4 | No  | 4.83  | 0.59 | 7.268  | 03.11.22 | GG |
| 88 | F | 23 | 19.6 | No  | 6.71  | 0.28 | 9.027  | 03.11.22 | AG |
| 89 | F | 42 | 25.8 | No  | 5.99  | 0.35 | 32.895 | 03.11.22 | GG |
| 90 | F | 39 | 29.1 | No  | 7.75  | 0.43 | 32.513 | 03.11.22 | GG |
| 91 | M | 31 | 24.5 | No  | 0.87  | 0.51 | 60.854 | 03.11.22 | AG |
| 92 | F | 18 | 21.4 | No  | 5.65  | 1.05 | 11.504 | 03.11.22 | GG |
| 93 | F | 31 | 25.6 | No  | 2.71  | 0.95 | 36.208 | 03.11.22 | GC |
| 94 | M | 35 | 25.3 | No  | 0.15  | 0.42 | 38.551 | 03.11.22 | GG |
| 95 | M | 53 | 30.4 | Yes | 6.66  | 2.12 | 26.345 | 03.11.22 | GG |
| 96 | M | 45 | 29.1 | No  | 0.19  | 0.49 | 35.201 | 03.11.22 | AG |
| 97 | F | 48 | 24.7 | No  | 8.4   | 0.46 | 31.68  | 03.11.22 | AG |
| 98 | F | 45 | 27.5 | No  | 11.22 | 0.51 | 22.88  | 03.11.22 | AG |

|     |   |    |      |     |       |      |        |          |    |
|-----|---|----|------|-----|-------|------|--------|----------|----|
| 99  | M | 75 | 26.3 | No  | 12.08 | 3.73 | 51.202 | 03.11.22 | GG |
| 100 | F | 65 | 25.9 | No  | 11.46 | 1.63 | 34.214 | 03.11.22 | AG |
| 101 | F | 21 | 30.1 | No  | 11.38 | 5.59 | 15.488 | 04.11.22 | AG |
| 102 | M | 58 | 24.3 | Yes | 6.5   | 0.46 | 9.335  | 04.11.22 | GG |
| 103 | M | 54 | 34.5 | No  | 0.17  | 0.23 | 47.872 | 04.11.22 | AA |
| 104 | M | 23 | 18.6 | No  | 1.41  | 2.18 | 24.288 | 04.11.22 | AG |
| 105 | M | 34 | 23.8 | Yes | 2.83  | 0.42 | 7.504  | 04.11.22 | AG |
| 106 | F | 43 | 27.6 | No  | 14.7  | 0.48 | 14.291 | 04.11.22 | GG |
| 107 | M | 41 | 22.7 | No  | 5.36  | 0.6  | 75.44  | 04.11.22 | AG |
| 108 | M | 22 | 19.5 | No  | 2.03  | 1.6  | 24.905 | 04.11.22 | AG |
| 109 | F | 43 | 26.3 | No  | 5.66  | 1.6  | 29.107 | 04.11.22 | AG |
| 110 | F | 48 | 22.4 | No  | 12.8  | 0.89 | 36.255 | 04.11.22 | GG |
| 111 | M | 47 | 24.5 | No  | 12.64 | 2.39 | 59.341 | 04.11.22 | AA |
| 112 | M | 33 | 21.7 | No  | 13.7  | 0.97 | 15.449 | 04.11.22 | AG |
| 113 | F | 38 | 27.8 | No  | 13.09 | 2.44 | 20.366 | 04.11.22 | GT |
| 114 | M | 47 | 26.2 | No  | 10.96 | 7.43 | 3.089  | 04.11.22 | GG |
| 115 | M | 58 | 24.7 | Yes | 2.92  | 0.39 | 35.448 | 04.11.22 | AG |
| 116 | F | 35 | 23.5 | No  | 3.9   | 0.29 | 26.301 | 04.11.22 | GG |
| 117 | M | 18 | 20.3 | No  | 0.26  | 0.28 | 41.008 | 04.11.22 | AG |
| 118 | F | 38 | 31.3 | No  | 0.33  | 0.34 | 10.583 | 04.11.22 | AG |
| 119 | F | 60 | 19.7 | No  | 4.64  | 0.32 | 25.942 | 04.11.22 | AA |

<sup>a</sup> BMI, body mass index;

**Supplementary Figure S1.** Plasma 25(OH)D levels in blood samples of COVID-19-positive and COVID-19-negative participants separated by age; ns = not significant; y.o.. years old.

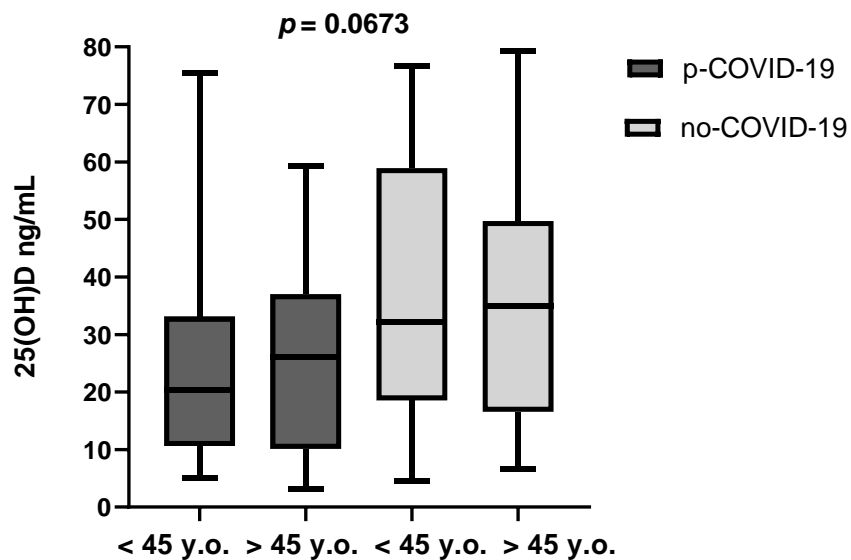

| Dunn's multiple comparisons test                | Mean rank diff. | Adjusted <i>P</i> < 0.05 | Summary |
|-------------------------------------------------|-----------------|--------------------------|---------|
| p-COVID-19 < 45 y.o. vs. p-COVID-19 > 45 y.o.   | -6.712          | No                       | ns      |
| no-COVID-19 < 45 y.o. vs. no-COVID-19 > 45 y.o. | 0.6944          | No                       | ns      |

**Supplementary Figure S2.** Plasma 25(OH)D levels in blood samples of COVID-19-positive and COVID-19-negative participants separated by sex; ns = not significant

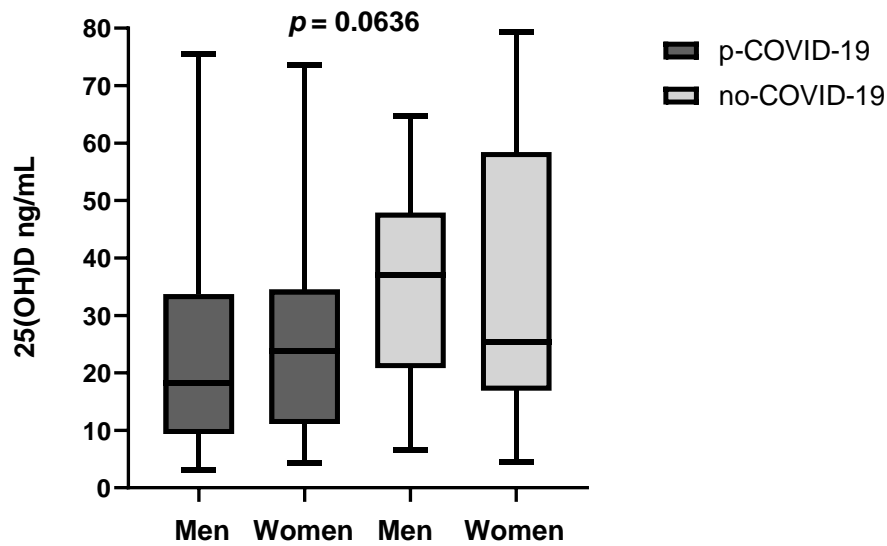

| Dunn's multiple comparisons test      | Mean rank diff. | Adjusted $P < 0.05$ | Summary |
|---------------------------------------|-----------------|---------------------|---------|
| p-COVID-19 men vs. p-COVID-19 women   | -5.344          | No                  | ns      |
| no-COVID-19 men vs. no-COVID-19 women | 8.996           | No                  | ns      |

**Supplementary Figure S3.** Plasma 25(OH)D levels in COVID-19-positive subjects' blood samples and rs2228570 alleles; ns = not significant

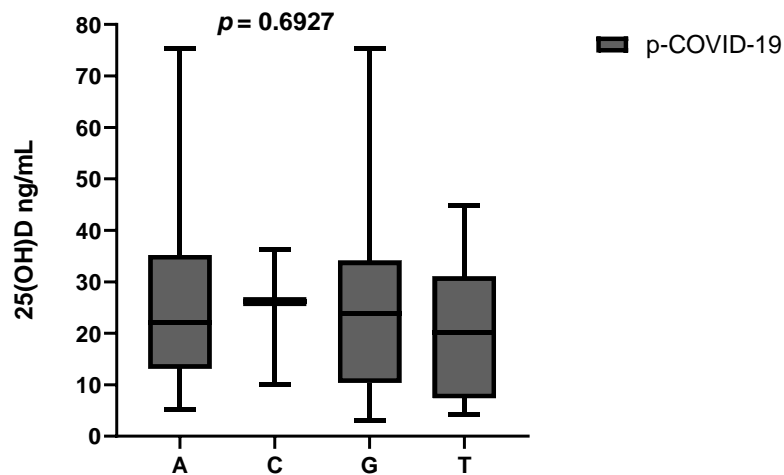

| Dunn's multiple comparisons test | Mean rank diff. | Adjusted $P < 0.05$ | Summary |
|----------------------------------|-----------------|---------------------|---------|
| A vs. C                          | -2.894          | ref (1.00)          | ns      |
| A vs. G                          | 2.824           | ref (1.00)          | ns      |
| A vs. T                          | 12.05           | ref (1.00)          | ns      |
| C vs. T                          | 5.718           | ref (1.00)          | ns      |
| G vs. T                          | 14.94           | ref (1.00)          | ns      |
| C vs. G                          | 9.221           | ref (1.00)          | ns      |

**Supplementary Figure S4.** Plasma 25(OH)D levels in COVID-19-negative subjects' blood samples and rs2228570 alleles; ns = not significant

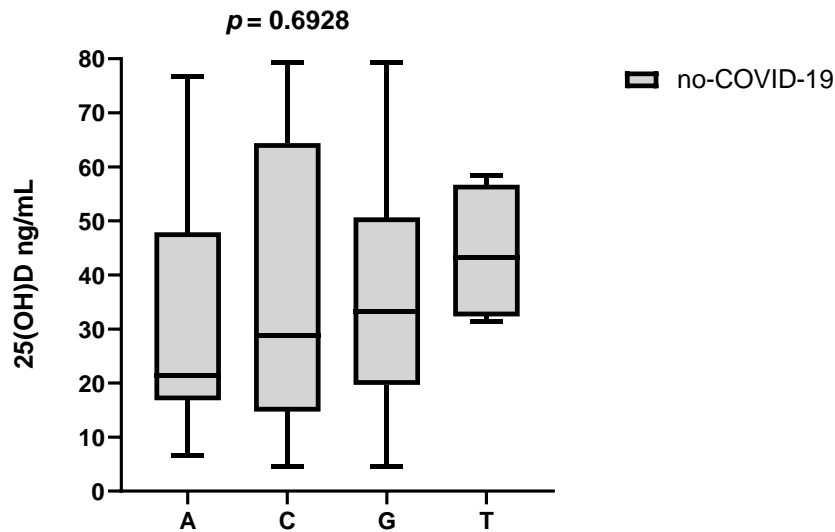

| Dunn's multiple comparisons test | Mean rank diff. | Adjusted $P < 0.05$ | Summary |
|----------------------------------|-----------------|---------------------|---------|
| A vs. C                          | -2.682          | ref (1.00)          | ns      |
| A vs. G                          | -3.361          | ref (1.00)          | ns      |
| A vs. T                          | -10.63          | ref (1.00)          | ns      |
| C vs. T                          | -0.6792         | ref (1.00)          | ns      |
| G vs. T                          | -7.950          | ref (1.00)          | ns      |
| C vs. G                          | -7.271          | ref (1.00)          | ns      |

### Power analysis of the data shown in Figure 1

**t tests - Means:** Wilcoxon-Mann-Whitney test (two groups)

**Options:** A.R.E. method

**Analysis:** Post hoc: Compute achieved power

**Input:** Tail(s) = One  
 Parent distribution = Normal  
 Effect size d = 0.5521576  
 $\alpha$  err prob = 0.05  
 Sample size group 1 = 88  
 Sample size group 2 = 31

**Output:** Noncentrality parameter  $\delta$  = 2.5834345  
 Critical t = 1.6586177  
 Df = 111.6366  
 Power (1- $\beta$  err prob) = 0.8219635
